# Supplementary material for: Assessment of Amikacin- and Capreomycin-Related Adverse Drug Reactions in Patients with Multidrug-Resistant Tuberculosis and Exploring the Role of Genetic Factors
Source: MDPI journal article supplement (doi:10.3390/jpm13040599), 2023-03-29
Supplement: s1 [file s1]

## Supplementary Table 1

The results of logistic regression analysis for significance of factors for ototoxicity occurrence in patients with MDR-TB (N=47). Statistically significant factors are highlighted in bold. *Ref* – reference.

### Standardized coefficients for variable *Ototoxicity*

| Source                    | Value      | Standard error | Wald Chi-Square | Pr > Chi <sup>2</sup> | Wald Lower bound (95%) | Wald Upper bound (95%) |
|---------------------------|------------|----------------|-----------------|-----------------------|------------------------|------------------------|
| Age                       | 0.062      | 0.246          | 0.064           | 0.801                 | -0.420                 | 0.544                  |
| Sex                       |            |                |                 |                       |                        |                        |
| Female                    | <i>Ref</i> |                |                 |                       |                        |                        |
| Male                      | 0.111      | 0.321          | 0.120           | 0.729                 | -0.517                 | 0.740                  |
| Capreomycin injections    |            |                |                 |                       |                        |                        |
| No                        | <i>Ref</i> |                |                 |                       |                        |                        |
| Yes                       | -0.228     | 0.251          | 0.828           | 0.363                 | -0.719                 | 0.263                  |
| Amikacin injections       |            |                |                 |                       |                        |                        |
| No                        | <i>Ref</i> |                |                 |                       |                        |                        |
| Yes                       | 0.458      | 0.233          | 3.867           | <b>0.049</b>          | 0.002                  | 0.915                  |
| Previous renal impairment |            |                |                 |                       |                        |                        |
| No                        | <i>Ref</i> |                |                 |                       |                        |                        |
| Yes                       | 0.181      | 0.242          | 0.558           | 0.455                 | -0.294                 | 0.655                  |
| HIV infection             |            |                |                 |                       |                        |                        |
| No                        | <i>Ref</i> |                |                 |                       |                        |                        |
| Yes                       | 0.078      | 0.402          | 0.037           | 0.847                 | -0.709                 | 0.865                  |
| ART                       |            |                |                 |                       |                        |                        |
| No                        | <i>Ref</i> |                |                 |                       |                        |                        |
| Yes                       | 0.078      | 0.376          | 0.043           | 0.837                 | -0.659                 | 0.814                  |
| HCV infection             |            |                |                 |                       |                        |                        |
| No                        | <i>Ref</i> |                |                 |                       |                        |                        |
| Yes                       | -0.052     | 0.309          | 0.028           | 0.867                 | -0.657                 | 0.554                  |
| DM                        |            |                |                 |                       |                        |                        |
| No                        | <i>Ref</i> |                |                 |                       |                        |                        |
| Yes                       | 0.039      | 0.207          | 0.035           | 0.851                 | -0.367                 | 0.445                  |
| BMI                       |            |                |                 |                       |                        |                        |
| Normal                    | <i>Ref</i> |                |                 |                       |                        |                        |
| Obese                     | 0.092      | 0.206          | 0.198           | 0.656                 | -0.313                 | 0.497                  |
| Overweight                | -0.002     | 0.205          | 0.000           | 0.992                 | -0.403                 | 0.399                  |
| Underweight               | 0.105      | 0.215          | 0.239           | 0.625                 | -0.316                 | 0.525                  |
| Smoking experience        |            |                |                 |                       |                        |                        |
| Non-smoker                | <i>Ref</i> |                |                 |                       |                        |                        |
| Smoking experience        | -0.150     | 0.326          | 0.210           | 0.646                 | -0.789                 | 0.490                  |
| Alcohol use               |            |                |                 |                       |                        |                        |
| Increased                 | <i>Ref</i> |                |                 |                       |                        |                        |
| Normal                    | -0.068     | 0.234          | 0.085           | 0.771                 | -0.528                 | 0.391                  |
| MDR-TB occurrence         |            |                |                 |                       |                        |                        |
| Primary TB                | <i>Ref</i> |                |                 |                       |                        |                        |
| Recurrence of TB          | 0.188      | 0.201          | 0.873           | 0.350                 | -0.206                 | 0.583                  |

## Supplementary Table 2

The results of logistic regression analysis for significance of factors for nephrotoxicity occurrence in patients with MDR-TB (N=47). *Ref* – reference.

### Standardized coefficients for variable *Nephrotoxicity*

| Source                    |                    | Value      | Standard error | Wald Chi-Square | Pr > Chi <sup>2</sup> | Wald Lower bound (95%) | Wald Upper bound (95%) |
|---------------------------|--------------------|------------|----------------|-----------------|-----------------------|------------------------|------------------------|
| Age                       |                    | 0.141      | 0.271          | 0.272           | 0.602                 | -0.389                 | 0.671                  |
| Sex                       |                    |            |                |                 |                       |                        |                        |
|                           | Female             | <i>Ref</i> |                |                 |                       |                        |                        |
|                           | Male               | 0.164      | 0.289          | 0.324           | 0.569                 | -0.402                 | 0.730                  |
| Capreomycin injections    |                    |            |                |                 |                       |                        |                        |
|                           | No                 | <i>Ref</i> |                |                 |                       |                        |                        |
|                           | Yes                | -0.357     | 0.250          | 2.032           | 0.154                 | -0.847                 | 0.134                  |
| Amikacin injections       |                    |            |                |                 |                       |                        |                        |
|                           | No                 | <i>Ref</i> |                |                 |                       |                        |                        |
|                           | Yes                | -0.373     | 0.296          | 1.585           | 0.208                 | -0.953                 | 0.208                  |
| Previous renal impairment |                    |            |                |                 |                       |                        |                        |
|                           | No                 | <i>Ref</i> |                |                 |                       |                        |                        |
|                           | Yes                | 0.206      | 0.240          | 0.737           | 0.391                 | -0.265                 | 0.677                  |
| HIV infection             |                    |            |                |                 |                       |                        |                        |
|                           | No                 | <i>Ref</i> |                |                 |                       |                        |                        |
|                           | Yes                | 0.009      | 0.466          | 0.000           | 0.984                 | -0.905                 | 0.923                  |
| ART                       |                    |            |                |                 |                       |                        |                        |
|                           | No                 | <i>Ref</i> |                |                 |                       |                        |                        |
|                           | Yes                | -0.018     | 0.411          | 0.002           | 0.965                 | -0.824                 | 0.788                  |
| HCV infection             |                    |            |                |                 |                       |                        |                        |
|                           | No                 | <i>Ref</i> |                |                 |                       |                        |                        |
|                           | Yes                | 0.279      | 0.340          | 0.673           | 0.412                 | -0.387                 | 0.944                  |
| DM                        |                    |            |                |                 |                       |                        |                        |
|                           | No                 | <i>Ref</i> |                |                 |                       |                        |                        |
|                           | Yes                | 0.065      | 0.265          | 0.060           | 0.807                 | -0.455                 | 0.585                  |
| BMI                       |                    |            |                |                 |                       |                        |                        |
|                           | Normal             | <i>Ref</i> |                |                 |                       |                        |                        |
|                           | Obese              | 0.249      | 0.228          | 1.194           | 0.275                 | -0.197                 | 0.695                  |
|                           | Overweight         | 0.168      | 0.202          | 0.696           | 0.404                 | -0.227                 | 0.563                  |
|                           | Underweight        | 0.278      | 0.237          | 1.374           | 0.241                 | -0.187                 | 0.742                  |
| Smoking experience        |                    |            |                |                 |                       |                        |                        |
|                           | Non-smoker         | <i>Ref</i> |                |                 |                       |                        |                        |
|                           | Smoking experience | 0.024      | 0.323          | 0.005           | 0.942                 | -0.609                 | 0.657                  |
| Alcohol use               |                    |            |                |                 |                       |                        |                        |
|                           | Increased          | <i>Ref</i> |                |                 |                       |                        |                        |
|                           | Normal             | 0.447      | 0.318          | 1.980           | 0.159                 | -0.176                 | 1.071                  |
| MDR-TB occurrence         |                    |            |                |                 |                       |                        |                        |
|                           | Primary TB         | <i>Ref</i> |                |                 |                       |                        |                        |
|                           | Recurrence of TB   | 0.089      | 0.205          | 0.189           | 0.664                 | -0.313                 | 0.491                  |
